# Supplementary material for: The transcription factor ATF3 switches cell death from apoptosis to necroptosis in hepatic steatosis in male mice
Source: PubMed Central journal article supplement (PMC9871012; doi:10.1038/s41467-023-35804-w), 2023-01-23

## Supplementary Information for

### **The transcription factor ATF3 switches cell death from apoptosis to necroptosis in hepatic steatosis in male mice**

Yuka Inaba, Emi Hashiuchi, Hitoshi Watanabe, Kumi Kimura, Yu Oshima, Kohsuke Tsuchiya, Shin Murai, Chiaki Takahashi, Michihiro Matsumoto, Shigetaka Kitajima, Yasuhiko Yamamoto, Masao Honda, Shun-Ichiro Asahara, Kim Ravnskjaer, Shin-ichi Horike, Shuichi Kaneko, Masato Kasuga, Hiroyasu Nakano, Kenichi Harada, Hiroshi Inoue

#### **Contents**

Supplementary Methods

Supplementary Table 1. Antibodies for immunoblotting and immunohistochemistry

Supplementary Table 2. Specific primer sequences used for quantitative PCR

Supplementary Table 3. Sequences of various lengths and their mutants used to construct the Ripk3 promoter

Supplementary Table 4. Antisense probe sequences for in situ hybridisation

Supplementary Table 5. Baseline characteristics by stage

Supplementary Fig. 1. Non-apoptotic cell death is increased in severe steatosis after hepatectomy

Supplementary Fig. 2. Non-apoptotic cell death due to necroptosis in severe steatosis after hepatectomy

Supplementary Fig. 3. ATF3 deficiency prevents steatosis-induced necroptosis after hepatectomy

Supplementary Fig. 4. Atf3 overexpression increases necroptosis in un-hepatectomised severe steatosis

Supplementary Fig. 5. eIF2 $\alpha$  dephosphorylation and TNF $\alpha$  neutralisation in hepatic steatosis after hepatectomy

Supplementary Fig. 6. Schematic representation of the Ripk3 promoter region and the reporter plasmid

Supplementary Fig. 7. ATF3 switches apoptosis to necroptosis in hepatocytes

Supplementary Fig. 8. RIPK3 knockdown ameliorates NASH induced by MCD feeding

Supplementary Fig. 9. ATF3 knockout prevents MCD-induced NASH

Supplementary Fig. 10. Correlation of ATF3, RIPK3 or phosphorylated RIPK3 with blood aminotransferase levels in the liver of a patient with advanced NASH.

Supplementary References

Uncropped Gels and Blots for supplementary figures

## **Supplementary Methods**

### **Analysis of plasma and hepatic parameters**

Blood glucose levels were measured using a Glucocard G+ Meter (Arkray, Kyoto, Japan). Plasma aspartate aminotransferase/alanine aminotransferase (AST/ALT) levels were measured using the Transaminase CII-Test-Wako kit (Fujifilm Wako Pure Chemical Corp., Osaka, Japan). Plasma insulin concentrations were determined using a mouse insulin ELISA kit (Fujifilm Wako Pure Chemical Corp.). Hepatic triglyceride contents were measured using the triglyceride E-Test-Wako kit (Fujifilm Wako Pure Chemical Corp.)<sup>1</sup>.

### **DNA methylation**

We performed bisulfite pyrosequencing to quantitatively determine the methylation status of individual CpG sites<sup>2</sup>. Bisulfite treatment of 1 µg genomic DNA was performed using the EZ DNA Methylation-Gold kit (Zymo Research Inc., Seattle, WA) according to the manufacturer's instructions. Bisulfite-treated DNA was initially subjected to PCR amplification. The PyroMark PCR kit (Qiagen N.V., Venlo, Netherlands) was used to amplify the bisulfite-treated DNA according to the manufacturer's instructions. Pyrosequencing was performed using a PyroMark Q24 Pyrosequencer in conjunction with PyroMark Q24 Assay software 2.0.6 (Qiagen).

### **Separation of hepatic parenchymal and non-parenchymal cells**

The liver was perfused using the following hepatocyte isolation method<sup>3</sup>. The liver of each anaesthetised mouse was perfused at a rate of 4.5 mL/min for the first 3 min with Hank's balanced salt solution (HBSS) (Fujifilm Wako Pure Chemical Corp.) containing 10 mM HEPES-NaOH (pH 7.4) and then for 15 min with HBSS containing collagenase type I (0.3 mg/ml) (Worthington, Lakewood, NY) and Protease Inhibitor Cocktail Complete-EDTA free (one tablet per 50 ml) (Roche, Basel, Switzerland). The perfused liver was harvested, incubated with HBSS(-) containing type I collagenase at 37°C for 15 min and mixed using GentleMACS Dissociators (Miltenyi Biotec, Bergisch Gladbach, Germany), first with the m\_liver\_03\_01 dissociation program and then with the m\_liver\_04\_01 program. All of the dissociated liver was filtered through a 100-µm filter membrane and the filtrate was centrifuged at 500 rpm for 10 min at 4°C. Percoll (Merck KGaA, Darmstadt, Germany) solutions (15%, 30% and 45%) were prepared by dilution with DMEM. The pellet was resuspended in 10 mL DMEM and gently laid on top of 10 mL of the 15% Percoll layer, 10 mL of the 30% Percoll layer and 15 mL of the 45% Percoll layer. Samples were centrifuged at 500 rpm for 10 min at 4°C in a swinging rotor. Parenchymal cells were collected from the pellets. Non-parenchymal cells were collected between the 15% and 30% Percoll layers.

**Supplementary Table 1. Antibodies for immunoblotting and immunohistochemistry**

| Protein               | Application | Species    | Supplier           | Catalogue No. | Concentration   |
|-----------------------|-------------|------------|--------------------|---------------|-----------------|
| Cleaved caspase-3     | WB<br>IF    | Mouse, Rat | Cell Signaling     | #9661S        | 1:1000          |
| Caspase-3             | WB          | Mouse, Rat | Cell Signaling     | #9665         | 1:1000          |
| Cleaved caspase-8     | WB          | Mouse      | Cell Signaling     | #8592S        | 1:1000          |
| Caspase-8             | WB          | Mouse      | ENZO               | ALX-804-447   | 1:1000          |
| p-RIPK3 (S232)        | WB          | Mouse      | Abcam              | ab195117      | 1:1000          |
| RIPK3                 | WB          | Mouse      | Abcam              | ab58828       | 1:1000          |
| ACTIN                 | WB          | Mouse, Rat | Sigma-Aldrich      | A5441         | 1:2000          |
| p-eIF2 $\alpha$ (S51) | WB          | Mouse      | Cell Signaling     | #3597S        | 1:1000          |
| eIF2 $\alpha$         | WB          | Mouse      | Cell Signaling     | #9722         | 1:1000          |
| CHOP                  | WB          | Mouse      | Santa Cruz         | sc-575        | 1:200           |
| ATF3                  | WB          | Mouse      | Santa Cruz         | sc-188        | 1:200           |
| p-MLKL (S345)         | WB          | Mouse      | Abcam              | ab196436      | 1:1000          |
| MLKL                  | WB          | Mouse      | Cell Signaling     | #28640        | 1:1000          |
| Halo                  | WB          |            | Promega            | G9281         | 1:1000          |
| GPX4                  | WB          | Mouse      | Abcam              | ab125006      | 1:1000          |
| GADD34                | WB          | Mouse      | Santa Cruz         | sc-825        | 1:200           |
| p-c-Jun               | WB          | Mouse      | Cell Signaling     | #9261         | 1:1000          |
| c-Jun                 | WB          | Mouse      | Santa Cruz         | sc-1694       | 1:200           |
| ATF3                  | IHC         | Human      | Abcam              | Ab191513      | 1:200           |
| RIPK3                 | IHC         | Human      | Cell Signaling     | #10188        | 1:200           |
| p-RIPK3               | IHC         | Human      | Abcam              | Ab209384      | 1:1000          |
| GFP                   | WB<br>IHC   |            | MBL                | 598           | 1:1000<br>1:100 |
| mCherry               | WB          |            | Proteintech        | 26765-1-AP    | 1:1000          |
| mCherry               | IHC         |            | SICGEN             | AB0040-200    | 1:500           |
| Cleaved caspase-8     | WB          | Rat        | NOVUS              | NB100-56116   | 1:1000          |
| Caspase-8             | WB          | Rat        | Proteintech        | 13423-1-AP    | 1:1000          |
| p-RIPK3 (S316)        | WB          | Rat        | Signalway Antibody | #12840        | 1:1000          |
| RIPK3                 | WB          | Rat        | NOVUS              | NBP1-77299    | 1:1000          |
| p-MLKL (S358)         | WB          | Rat        | Invitrogen         | PA5-105678    | 1:1000          |
| MLKL                  | WB          | Rat        | Proteintech        | 66675-1-Ig    | 1:1000          |

WB, western blot; IF, immunofluorescence; IHC, immunohistochemistry.

**Supplementary Table 2. Specific primer sequences used for quantitative PCR**

| Gene           | GenBank Accession No. | Sequence                                                                        |
|----------------|-----------------------|---------------------------------------------------------------------------------|
| <i>Rplp0</i>   | NM_007475             | Forward 5'-TTCCAGGCTTTGGGCATCA-3'<br>Reverse 5'-ATG TTCAGCATG TTCAGCAGTGTG-3'   |
| <i>Ripk3</i>   | NM_019955.2           | Forward 5'-TTTACTGAGACTCCCGGTCTCAC-3'<br>Reverse 5'-GTTCCCAATCTGCACTTCAGAACA-3' |
| <i>Ripk1</i>   | NM_009068.3           | Forward 5'-GCAGCATGACTGTGTACCCTTACC-3'<br>Reverse 5'-TGCGATCATTCTCGTCCTGTG-3'   |
| <i>Mkl1</i>    | NM_001310613.1        | Forward 5'-TGCTGCTTCAGGTTTATCATTGG-3'<br>Reverse 5'-CACGCTAATTTGCAACTGCATC-3'   |
| <i>Tnf</i>     | NM_013693.2           | Forward 5'-AAGCCTGTAGCCCACGTCGTA-3'<br>Reverse 5'-GGCACCACTAGTTGGTTGTCTTTG-3'   |
| <i>Gpx4</i>    | NM_001037741.4        | Forward 5'-TGCAACAGCTCCGAGTTCCT-3'<br>Reverse 5'-GTGACGATGCACACGAAACC-3'        |
| <i>Slc7a11</i> | NM_011990.2           | Forward 5'-AACGCCAGATATGCATCGTC-3'<br>Reverse 5'-GGTGCTGAATGGGTCCGAGTA-3'       |
| <i>Ddit3</i>   | NM_007837.3           | Forward 5'-AATAACAGCCGGAACCTGAGGA-3'<br>Reverse 5'-ACTCAGCTGCCATGACTGCAC-3'     |
| <i>Atf3</i>    | NM_007498.3           | Forward 5'-CGAAGACTGGAGCAAATG-3'<br>Reverse 5'-AGGTTAGCAAATCCTCAAATAC-3'        |
| <i>Tgfb1</i>   | NM_011577.1           | Forward 5'-TACGGCAGTGGCTGAACCAA-3'<br>Reverse 5'-CGGTTTCATGTCATGGATGGTG-3'      |
| <i>Acta2</i>   | NM_007392.3           | Forward 5'-GACAATGGCTCTGGGCTCTGTA-3'<br>Reverse 5'-TTTGGCCCATTCCAACCATTA-3'     |
| <i>Coll1a1</i> | NM_007742.3           | Forward 5'-GACATGTTTCAGCTTTGTGGACCTC-3'<br>Reverse 5'-GGGACCCTTAGGCCATTGTGTA-3' |
| <i>rAtf3</i>   | NM_012912.2           | Forward 5'-GCTGCTGCCAAGTGTGCGAA-3'<br>Reverse 5'-CGGTGCAGGTTGAGCATGTA-3'        |
| <i>rRipk3</i>  | NM_139342.1           | Forward 5'-CTACTGCACCGGGACCTCAA-3'<br>Reverse 5'-GTGGACAGGCCAAAGTCTGCTA-3'      |
| <i>rMkl1</i>   | XM_008772571.2        | Forward 5'-TGAAAAGATCCCGTTTGAAG-3'<br>Reverse 5'-TGATCTCCTGCAACAACCTCG-3'       |
| <i>Gapdh</i>   | NM_017008.4           | Forward 5' -GGCACAGTCAAGGCTGAGAATG-3'<br>Reverse 5' -ATGGTGGTGAAGACGCCAGTA-3'   |
| <i>Alb</i>     | NM_009654.4           | Forward 5' -TGTGCAGAGGCTGACAAGGA-3'<br>Reverse 5' -TCTGACGGACAGATGAGACCAA-3'    |
| <i>Adgre1</i>  | NM_010130.4           | Forward 5' -AGCTGTAACCGGATGGCAAAC-3'<br>Reverse 5' -GACTGTACCCACATGGCTGATGA-3'  |
| <i>Cdh5</i>    | NM_009868.4           | Forward 5' -TGCAACAGACAAGGATGTGGTG-3'<br>Reverse 5' -ACTTGGCATGCTCCCGATTA-3'    |
| <i>Des</i>     | NM_010043.2           | Forward 5' -GACGACCTGCAGAGGCTCAA-3'<br>Reverse 5' -GATTCTGCGCTCCAGGTCAA-3'      |
| <i>Gfp</i>     | LT726937.1            | Forward 5' -GAGCGCACCATCTTCTTCAAG-3'<br>Reverse 5' -AGCTTGTGCCCCAGGATGTTG-3'    |
| <i>mCherry</i> | MW247150.1            | Forward 5' -CCCCGTAATGCAGAAGAAGA-3'<br>Reverse 5' -GCTTCTGGCCTTGTAGGTG-3'       |

**Supplementary Table 3. Sequences of various lengths and their mutants used to construct the Ripk3 promoter**

| Plasmid                                    | Sp1 Binding Site          | Sequence                                                                                     |
|--------------------------------------------|---------------------------|----------------------------------------------------------------------------------------------|
| pGL4.27_mRipk3 promoter_-504/+210          | GCTCCACCCCA<br>(WT)       | Forward 5'-TATAGGTACCACCCTGTCTCAAAAGTAAGT-3'<br>Reverse 5'-TATAAAGCTTAGCGGCTTCCTGGAGTTATG-3' |
| pGL4.27_mRipk3 promoter_-255/+210          | GCTCCACCCCA<br>(WT)       | Forward 5'-TATAGGTACCCTCCGTGATCTTAGGACC-3'<br>Reverse 5'-TATAAAGCTTAGCGGCTTCCTGGAGTTATG-3'   |
| pGL4.27_mRipk3 promoter_-140/+210          | GCTCCACCCCA<br>(WT)       | Forward 5'-TATAGGTACCAATCGTTCCTGGATGGTGAG-3'<br>Reverse 5'-TATAAAGCTTAGCGGCTTCCTGGAGTTATG-3' |
| pGL4.27_mRipk3 promoter_-60/+210           | GCTCCACCCCA<br>(WT)       | Forward 5'-TATAGGTACCACGTGCACAGGAAATAGC-3'<br>Reverse 5'-TATAAAGCTTAGCGGCTTCCTGGAGTTATG-3'   |
| pGL4.27_mRipk3 promoter_-12/+210           | None                      | Forward 5'-TATAGGTACCGCGGAGATAGAAGGAGCCTC-3'<br>Reverse 5'-TATAAAGCTTAGCGGCTTCCTGGAGTTATG-3' |
| pGL4.27_mRipk3 promoter_-504/+210: Sp1-mt1 | GCTCCAGCCCA<br>(C→G)      | Forward 5'-GTTTTCAATGCTCCAGCCCAGGGGGCGGAG-3'<br>Reverse 5'-CTCCGCCCCCTGGGCTGGAGCATTGAAAAC-3' |
| pGL4.27_mRipk3 promoter_-504/+210: Sp1-mt2 | GCTCGACCCCA<br>(C→G)      | Forward 5'-GTTTTCAATGCTCGACCCCAGGGGGCGGAG-3'<br>Reverse 5'-CTCCGCCCCCTGGGTCGAGCATTGAAAAC-3'  |
| pGL4.27_mRipk3 promoter_-504/+210: Sp1-mt3 | GCTCGAGCCCA<br>(C→G, C→G) | Forward 5'-GTTTTCAATGCTCGAGCCCAGGGGGCGGAG-3'<br>Reverse 5'-CTCCGCCCCCTGGGTCGAGCATTGAAAAC-3'  |

#### Supplementary Table 4. Antisense probe sequences for in situ hybridisation

1) Mouse activating transcription factor 3 (Atf3)

Accession #: NM\_007498.3

CTCAGAATGGACGGACACCGGAAGACGAGAGGAACCTCTTTATCCAACAGATAAAAAGAAGGAA  
CATTGCAGAGCTAAGCAGAGGTGGCACGGAGGCAATTGGGGAGTTCTTACTGAATCCTCCTTTT  
CCACCCACACCCTGAAGCCATTGGAAAACCTGGCTTCTGTGCACTTCTAGAATCCCAGCAGCC  
AAGAGCCGTTGGGGCAGGAGGGCCTGTGGTGACCTACTGCATTGACCCACTCTGCCCCGAGTG  
AACCGTGGAGCAGGCAGGAGCATCCTTTGTCTCACCAATTCCAGGATTTAGGCCTTATCATCCC  
GGCCAGTCTCAGATGACCTAGCTGGCCCCAGGCTGGGGTCTATGCAAAGCAGGATCCCCTAA  
TGGGATTCAGGCAGAAGTGTCTACCTTGATAGGTGGGGTGGGACCACATCCTCCACTGTGGCTG  
ACAACGCCCTTCCAAGGGAATATGGAATGAGAACATTCATTATTGAGGTTGTCCAATGGCCAGG  
GTATGCTTTCTAGAAAATATGCTGTTCTGTCCCAGAATGACTGTGCATAGGGTATCCGTTTCAGA  
GCCTGGTGTGTGCTATTTAGATGTTTGTCTTGACAAACATTGGCATGATTTTTCCGGGAGTTTC  
ATCAGATCTGATTTCTGAGAGTCTGGGGATCTGCCATGGTGGAAAGTGCCCTCAAAGCATT  
GTGTGGCCACATGAACTGGCTGGCACCAGGGGAGTGAACTGGCTGATGACCAGCTGAGCCAC  
TTTGTGCCAACAGAGGATGGACGACACCTTCCCTGTACCCACTGCAGAGGAAGAACCCTGGGC  
ACAGCAGCTTTGTCCTTGGCTACAACTGTTACAACGTCACACAATGAAGGCACAAAGTCCAAC  
TTTCAAAGGGTGTAGGACTCCATACTCAGTGACAGGGCAGGAAGAGCCAAAGATAACCACAGC

2) Mouse receptor-interacting serine-threonine kinase 3 (Ripk3)

Accession #: NM\_019955.2

GAATTCGGGGCCTGAACCTCCGTGCCTTGACCTACTGATTGTTCCCTTTCAGACCCTGCCTTCC  
TCTCAGTCCACACTCCGAGCCGTAGACGTCGGGTTTCCAGCTCCGTCTGTGCACACATAACTCCA  
GGAAGCCGCTAGCTCCCGACGATGTCTTCTGTCAAGTTATGGCCTACTGGTGCCTCAGCGGTTCC  
TCTGGTGAGCCGTGAAGAACTGAAGAAGCTGGAGTTTGTGGGTAAAGGAGGGTTCGGAGTCGT  
GTTCCGGGCACACCACAGAACATGGAACCATGATGTAGCAGTCAAGATCGTGAACCTCGAAGAA  
GATATCCTGGGAGGTGAAGGCTATGGTTAATCTTCGTAATGAGAACGTTCTGCTCCTGCTGGGG  
GTCCTGAGGACCTCCAGTGGGACTTCGTGTCCGGGCAGGCTCTGGTGACAAGATTCATGGAGA  
ATGGCTCCCTCGCAGGGCTGCTGCAACCCGAGTGCCCTCGGCCCTGGCCACTCCTCTGTGCCTG  
CTGCAGGAAGTGGTGCTGGGGATGTG

**Supplementary Table 5. Baseline characteristics by stage**

|                       | Stage 0                | Stage 1–2                | Stage 3–4                | Total                    | p* |
|-----------------------|------------------------|--------------------------|--------------------------|--------------------------|----|
| Age at biopsy (years) | 50.3 ± 3.8<br>(n = 3)  | 47.9 ± 4.7<br>(n = 16)   | 63.5 ± 2.6<br>(n = 29)   | 57.1 ± 2.5<br>(n = 43)   | -  |
| ALT (U/L)             | 89.0 ± 38.0<br>(n = 2) | 123.7 ± 25.9<br>(n = 10) | 106.7 ± 22.3<br>(n = 13) | 112.1 ± 15.5<br>(n = 25) | -  |
| AST (U/L)             | 48.5 ± 12.5<br>(n = 2) | 66.1 ± 10.8<br>(n = 10)  | 90.2 ± 11.5<br>(n = 13)  | 77.2 ± 7.8<br>(n = 25)   | -  |

\*p-values derived from one-way ANOVA followed by Tukey–Kramer’s honestly significant difference test. Data are presented as the mean values ± SEM. Only laboratory values from patients who underwent liver biopsy were included. ALT, alanine aminotransferase; AST, aspartate aminotransferase.

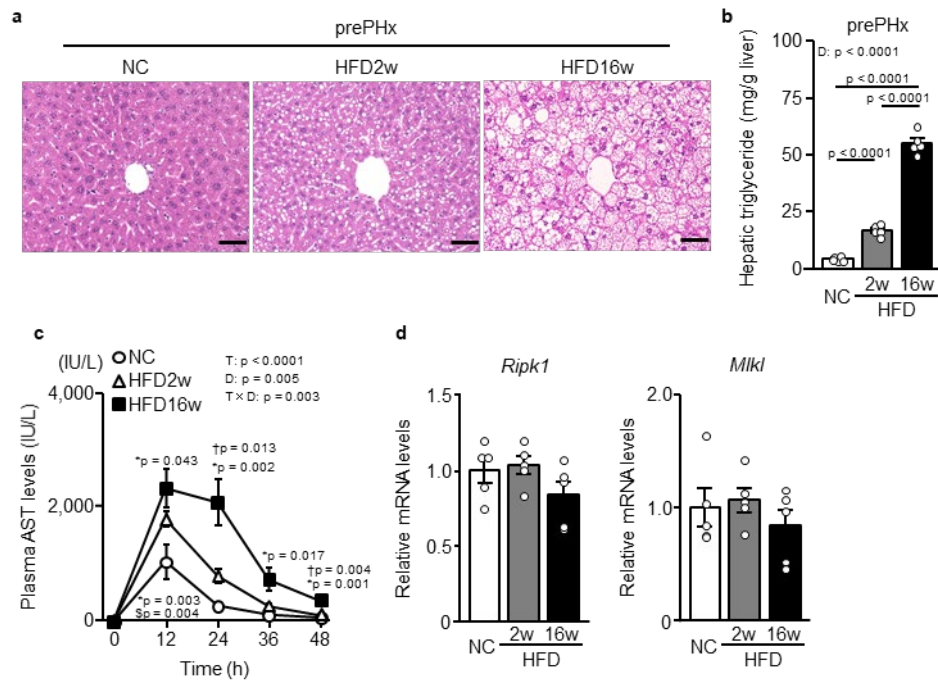

### Supplementary Fig. 1. Non-apoptotic cell death is increased in severe steatosis after hepatectomy

(a–b) Severity of hepatic steatosis in mice fed normal chow (NC) or a HFD for 2 or 16 weeks. (a) Haematoxylin-eosin staining of liver samples collected pre-hepatectomy (prePHx). Scale bar, 50  $\mu$ m. (b) Hepatic triglyceride levels. (c–d) Mice fed NC or a HFD for 2 or 16 weeks underwent 70% partial hepatectomy. (c) Plasma aspartate aminotransferase (AST) levels over time after hepatectomy. (d) Quantitative PCR analysis. Data are presented as the mean values  $\pm$  SEM. [ $n = 5$ /group, biologically independent samples]. Statistics: one-way ANOVA followed by Tukey's multiple comparisons test (b, d), one-way repeated-measures ANOVA followed by Bonferroni's multiple comparisons test (c). \* indicates p-values for HFD16w versus NC; † indicates p-values for HFD16w versus HF2w; § indicates p-values for HFD2w versus NC; T, time effect; D, diet effect; T $\times$ D, time and diet interaction. Source data are provided as a Source Data file.



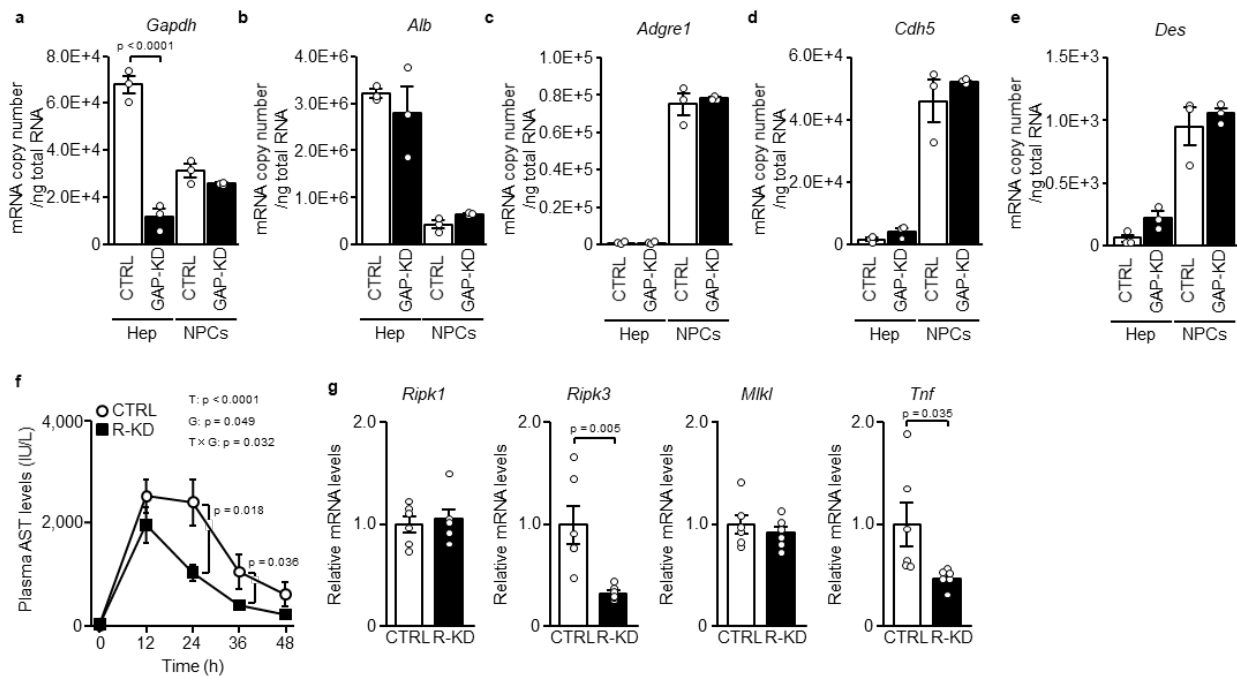

## Supplementary Fig. 2. Non-apoptotic cell death due to necroptosis in severe steatosis after hepatectomy

(a–e) Hepatic cellular specificity of knockdown by *Gapdh* siRNA. (f–g) HFD-fed mice received an intravenous injection of *Ripk3* or control siRNA and underwent 70% partial hepatectomy. (f) Plasma AST levels. (g) Quantitative PCR analysis. Data are presented as the mean values  $\pm$  SEM. [(a–e)  $n = 3$ /group; (f–g)  $n = 6$ /group, biologically independent samples]. Statistics: two-way ANOVA followed by Bonferroni’s multiple comparisons test (a–e), one-way repeated-measures ANOVA followed by Bonferroni’s multiple comparisons test (f), two-tailed Student’s *t*-test (g). Hep, Hepatocyte; NPCs, hepatic non-parenchymal cells; CTRL, control group; GAP-KD, *Gapdh* knockdown group; T, time effect; G, group effect; T×G, time and group interaction; CTRL, control group; R-KD, *Ripk3* knockdown group. Source data are provided as a Source Data file.

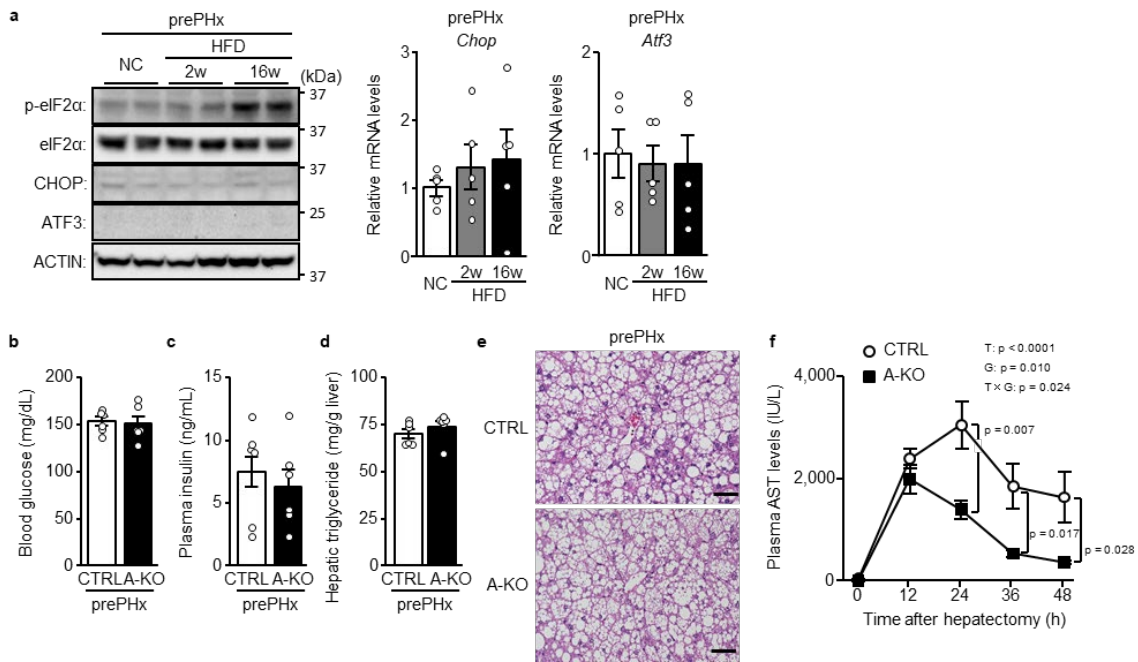

### Supplementary Fig. 3. ATF3 deficiency prevents steatosis-induced necroptosis after hepatectomy

(a) Mice were fed normal chow (NC) or a HFD for 2 or 16 weeks pre-hepatectomy (prePHx). Immunoblot analysis (left). Quantitative PCR analysis (right). (b–f) A-KO mice and littermates (CTRL) were fed a HFD for 16 weeks. (b–e) Pre-hepatectomy (prePHx) data. (b) Blood glucose levels. (c) Plasma insulin levels. (d) Hepatic triglyceride levels. (e) Haematoxylin-eosin staining of liver samples. Scale bar, 50  $\mu$ m. (f) Plasma AST levels over time after hepatectomy. Data are presented as the mean values  $\pm$  SEM. [(a)  $n = 5$ /group; (b–f)  $n = 6$ /group, biologically independent samples]. Statistics: one-way ANOVA followed by Tukey's multiple comparisons test (a), two-tailed Student's  $t$ -test (b–d), one-way repeated-measures ANOVA followed by Bonferroni's multiple comparisons test (f). T, time effect; G, group effect; T $\times$ G, time and group interaction. Source data are provided as a Source Data file.

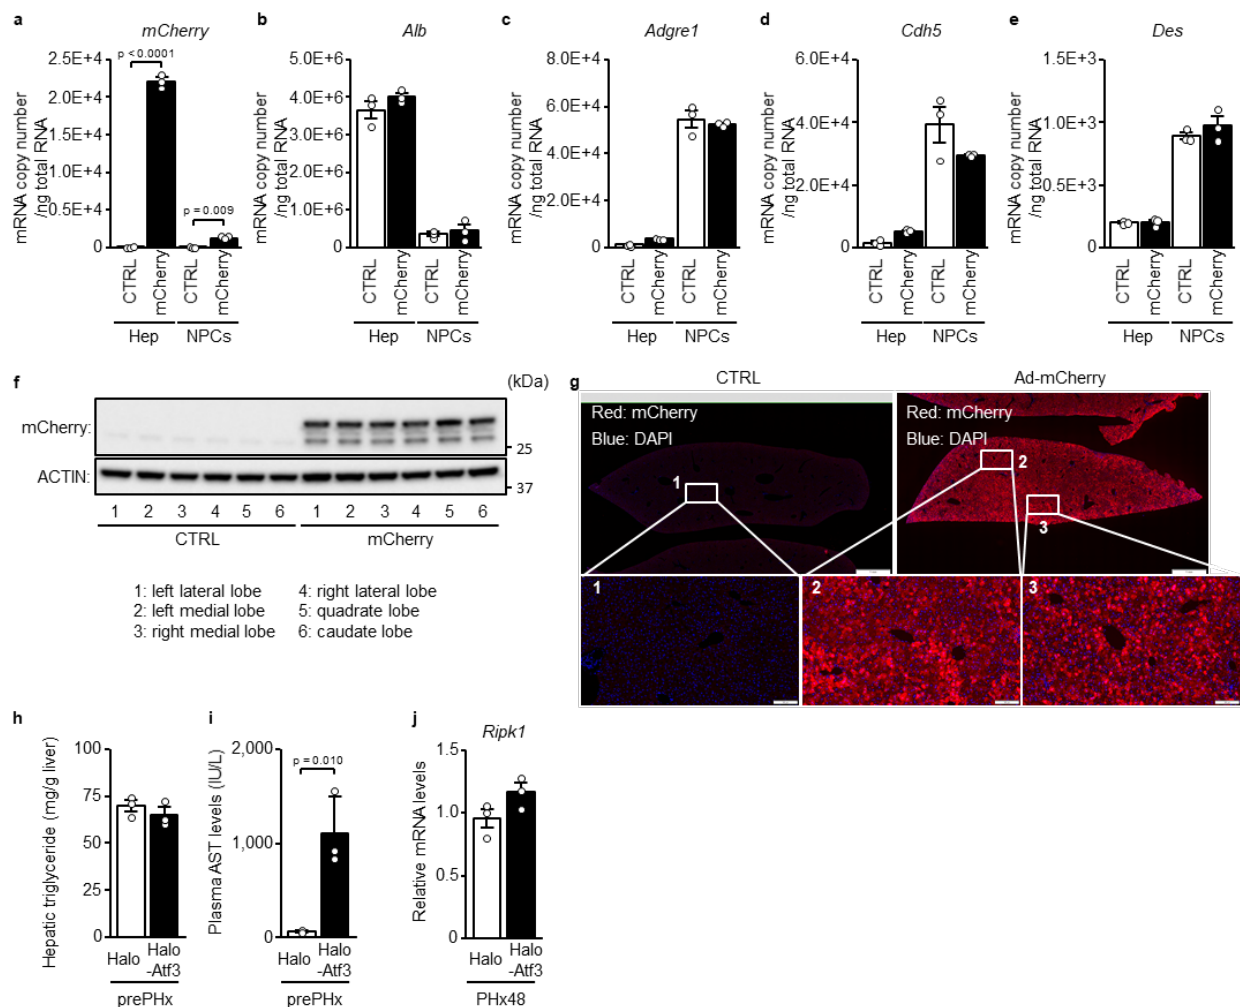

### Supplementary Fig. 4. Atf3 overexpression increases necroptosis in un-hepatectomised severe steatosis

(a–g) Mice were infected with adenovirus encoding mCherry. mCherry expression was hepatocyte-dominant (a–e) and ubiquitously expressed throughout the liver (f–g). Scale bar, 1 mm ((g) top). Scale bar, 100  $\mu$ m ((g) bottom). (h–j) Wild-type mice were fed a HFD for 16 weeks and halo-Atf3 or halo, as control, was overexpressed by adenovirus infection. (h) Hepatic triglyceride levels. (i) Plasma AST levels. (j) Quantitative PCR analysis of *Ripk1*. Data are presented as the mean values  $\pm$  SEM. [ $n = 3$ /group, biologically independent samples]. Statistics: two-way ANOVA followed by Bonferroni's multiple comparisons test (a–e), two-tailed Student's *t*-test (h–j). Source data are provided as a Source Data file.

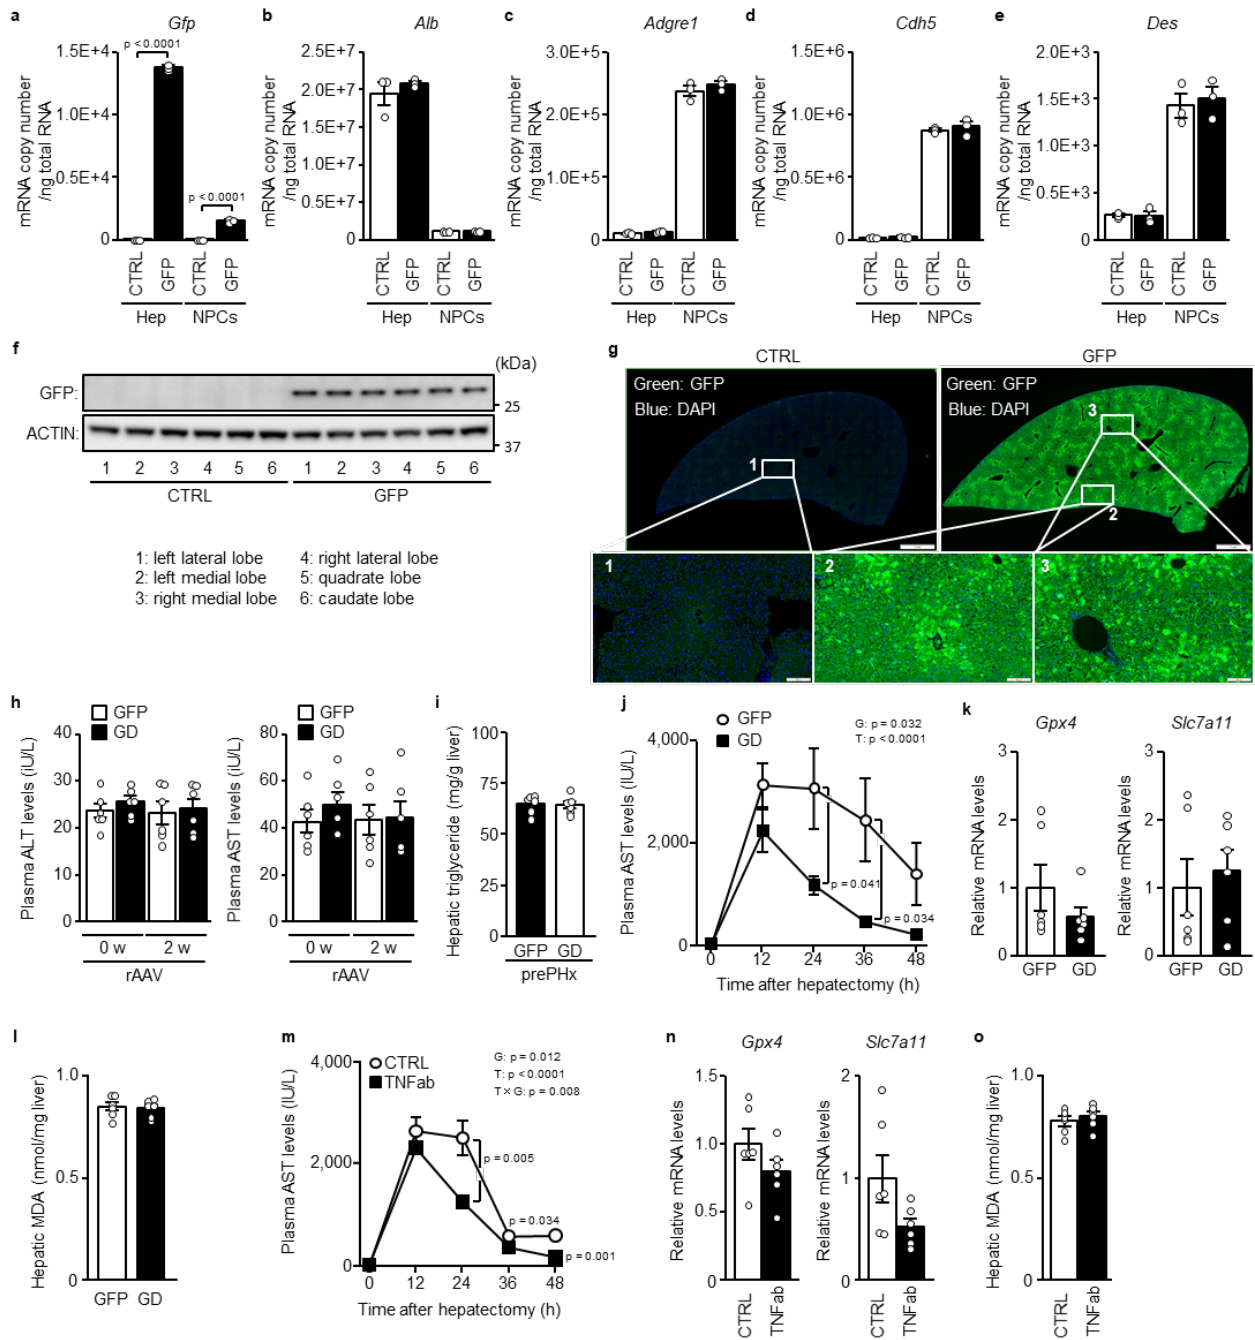

### Supplementary Fig. 5. eIF2 $\alpha$ dephosphorylation and TNF $\alpha$ neutralisation in hepatic steatosis after hepatectomy

(a–g) Mice were infected with recombinant adeno-associate virus (rAAV) encoding GFP. GFP expression was hepatocyte-dominant (a–e) and ubiquitously expressed throughout the liver (f–g). Scale bar, 1 mm ((g) top). Scale bar, 100  $\mu$ m ((g) bottom). (h–l) Mice with severe hepatic steatosis overexpressing Gadd34 (GD) or GFP by rAAV underwent partial hepatectomy 2 weeks after rAAV infection. (h) Plasma ALT and AST levels before and after 2 weeks infection (0w and 2w, respectively). (i) Hepatic triglyceride levels pre-hepatectomy (prePHx). (j) Plasma AST levels after hepatectomy. (k) Quantitative PCR analysis of genes

related to ferroptosis. (l) Hepatic MDA levels. (m–o) Mice with severe hepatic steatosis underwent partial hepatectomy and were injected with TNF $\alpha$ -neutralising antibody (TNFab) or anti-IgG (CTRL) 12 hours after hepatectomy. (m) Plasma AST levels. (n) Quantitative PCR analysis of genes related to ferroptosis. (o) Hepatic MDA levels. Data are presented as the mean values  $\pm$  SEM. [(a–f)  $n = 3$ /group; (h–o)  $n = 6$ /group, biologically independent samples]. Statistics: two-way ANOVA followed by Bonferroni's multiple comparisons test (a–e), two-tailed Student's  $t$ -test (h, i, k, l, n, o), one-way repeated-measures ANOVA followed by Bonferroni's multiple comparisons test (j, m). T, time effect; G, group effect; T $\times$ G, time and group interaction. Source data are provided as a Source Data file.



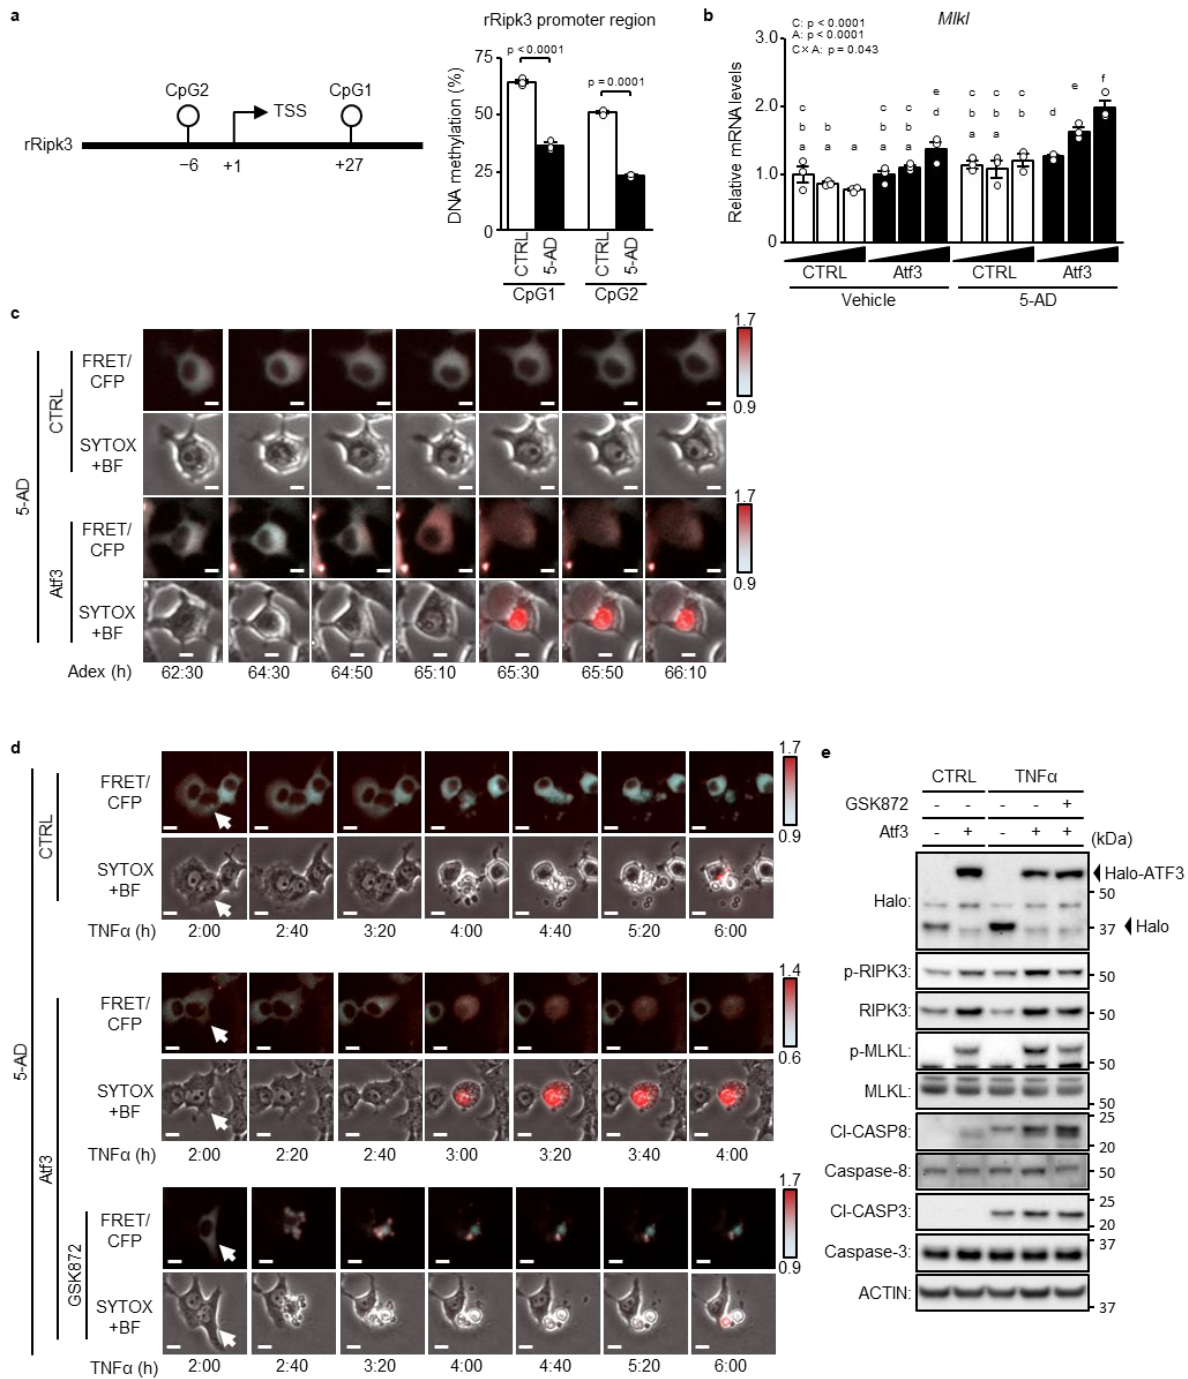

### Supplementary Fig. 7. ATF3 switches apoptosis to necroptosis in hepatocytes

(a) Schema of CpG in the Ripk3 promoter region of rat (left) and the DNA methylation levels of CpG (right). (b) Halo-Atf3 or halo was overexpressed by adenovirus in rat H4IIE cells treated with/without 5-AD. Expression levels of Mkl1 by quantitative PCR. (c) Time-lapse images of a single cell. Halo-Atf3 or halo was overexpressed by adenovirus in H4IIE-SMART cells treated with 5-AD. Scale bar, 5  $\mu$ m. (d) Time-lapse images of a single cell. Halo-Atf3 or halo was overexpressed by adenovirus in H4IIE-SMART cells treated with 5-AD. H4IIE-SMART cells were stimulated with TNF $\alpha$  and GSK872. Scale bar, 5  $\mu$ m. (e)

Immunoblot analysis. H4IIE cells were stimulated with TNF $\alpha$  and GSK872. Data are presented as the mean values  $\pm$  SEM. [ $n = 3$ /group, biologically independent samples]. Statistics: two-tailed Student's  $t$ -test (a), two-way ANOVA followed by Tukey's multiple comparisons test (b). C, chemical effect; A, adenovirus effect; C $\times$ A, chemical and adenovirus interaction. Source data are provided as a Source Data file.



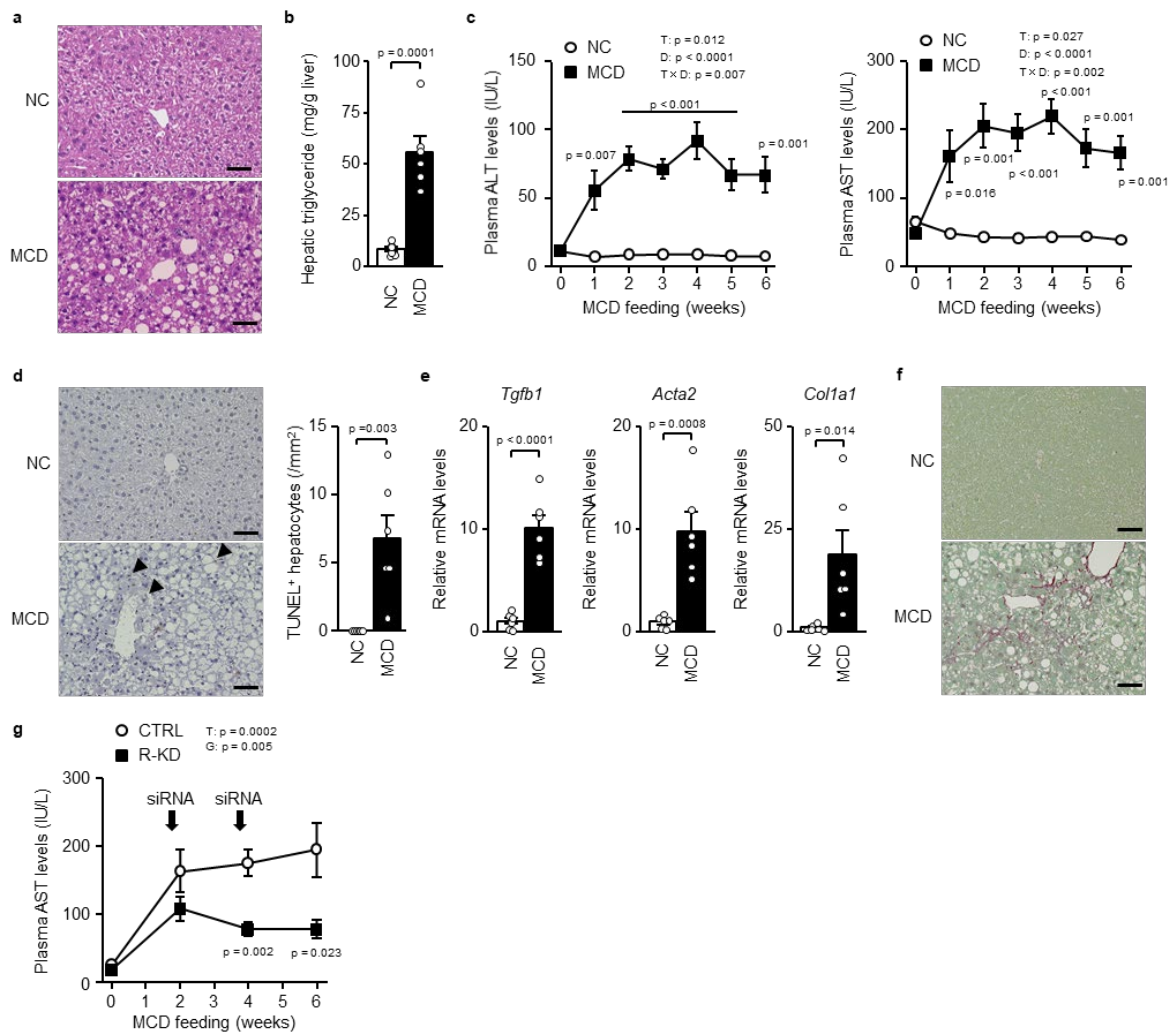

**Supplementary Fig. 8. RIPK3 knockdown ameliorates NASH induced by MCD feeding** (a–f) Wild-type mice were fed an MCD for 6 weeks. (a) Haematoxylin-eosin staining of liver samples. Scale bar, 50  $\mu$ m. (b) Hepatic triglyceride levels. (c) Plasma ALT and AST levels during MCD feeding. (d) TUNEL staining (left). Scale bar, 50  $\mu$ m. Arrowheads indicate TUNEL<sup>+</sup> hepatocytes. Number of TUNEL<sup>+</sup> hepatocytes (right). (e) Quantitative PCR analysis. (f) Sirius red staining. Scale bar, 50  $\mu$ m. (g) Ripk3 siRNA was injected into the mice at 2 and 4 weeks after MCD feeding. Plasma AST levels during MCD feeding. Data are presented as the mean values  $\pm$  SEM. [ $n = 6$ /group, biologically independent samples]. Statistics: two-tailed Student's *t*-test (b, d, e), one-way repeated-measures ANOVA followed by Bonferroni's multiple comparisons test (c, g). R-KD, Ripk3 knockdown; T, time effect; D, diet effect; T $\times$ D, time and diet interaction; G, group effect. Source data are provided as a Source Data file.

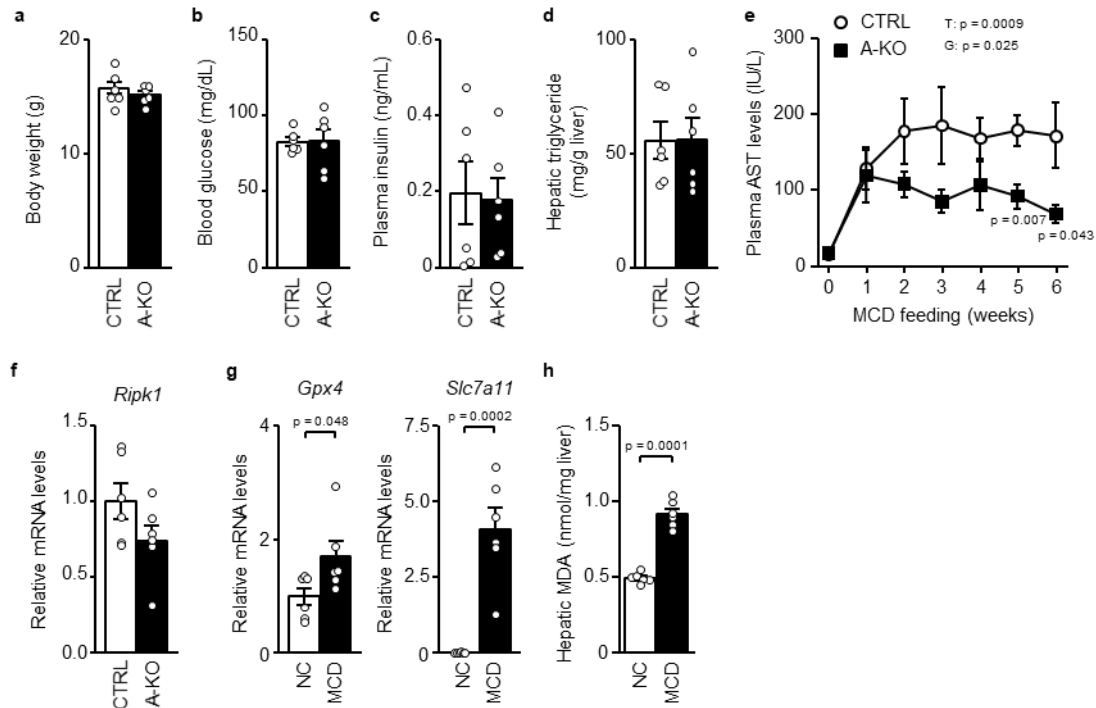

### Supplementary Fig. 9. ATF3 knockout prevents MCD-induced NASH

(a–f) ATF3 knockout mice (A-KO) and littermates (CTRL) were fed an MCD for 6 weeks. (a) Body weight. (b) Blood glucose concentration. (c) Plasma insulin levels. (d) Hepatic triglyceride levels. (e) Plasma AST levels at the indicated time points. (f) Quantitative PCR analysis of *Ripk1*. (g–h) Wild-type mice were fed an MCD for 6 weeks. (g) Quantitative PCR analysis of genes related to ferroptosis. (h) Hepatic MDA levels. Data are presented as the mean values  $\pm$  SEM. [ $n = 6$ /group, biologically independent samples]. Statistics: two-tailed Student's *t*-test (a–d, f–h), one-way repeated-measures ANOVA followed by Bonferroni's multiple comparisons test (e). T, time effect; G, group effect. Source data are provided as a Source Data file.

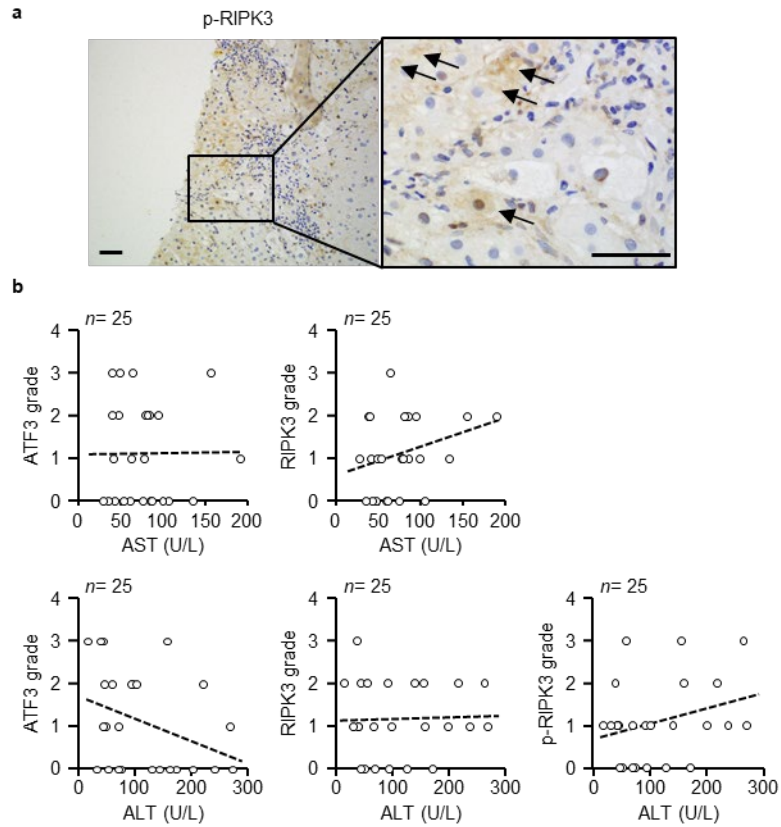

**Supplementary Fig. 10. Correlation of ATF3, RIPK3 or phosphorylated RIPK3 with blood aminotransferase levels in the liver of a patient with advanced NASH.**

(a) Images of phosphorylated RIPK3 (p-RIPK3) staining. Scale bar, 50  $\mu\text{m}$ . (b) Correlation of ATF3, RIPK3 or p-RIPK3 with blood aminotransferase levels, calculated using Spearman's rank correlation test. The liver biopsy samples are biologically independent samples. Source data are provided as a Source Data file.

### Supplementary References

1. Hashiuchi, E., *et al.* Diet Intake Control Is Indispensable for the Gluconeogenic Response to Sodium-Glucose Cotransporter 2 Inhibition in Male Mice. *J Diabetes Investig.* **12**, 35-47 (2021).
2. Hori, N., *et al.* Aberrant CpG methylation of the imprinting control region KvDMR1 detected in assisted reproductive technology-produced calves and pathogenesis of large offspring syndrome. *Anim Reprod Sci* **122**, 303-312 (2010).
3. Inaba, Y., *et al.* Growth arrest and DNA damage-inducible 34 regulates liver regeneration in hepatic steatosis in mice. *Hepatology* **61**, 1343-1356 (2015).

## Uncropped Gels and Blots

Uncropped images of original representative immunoblotting scans.

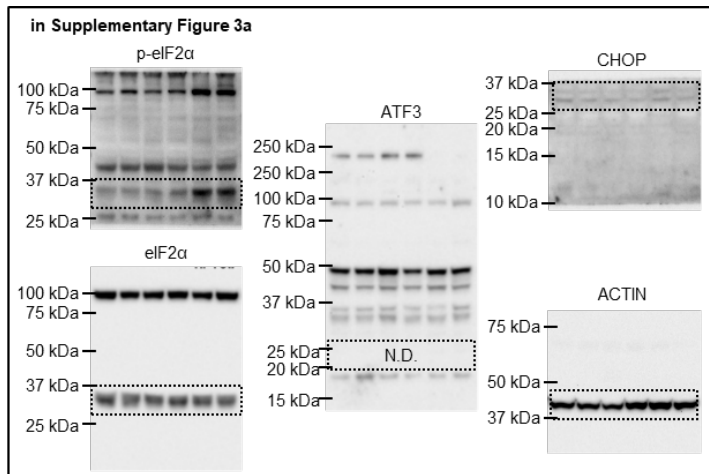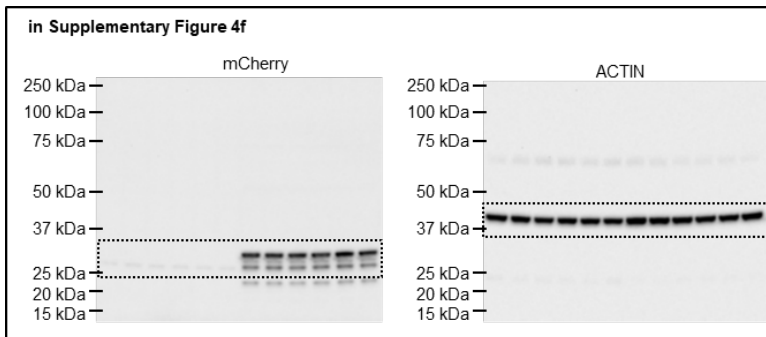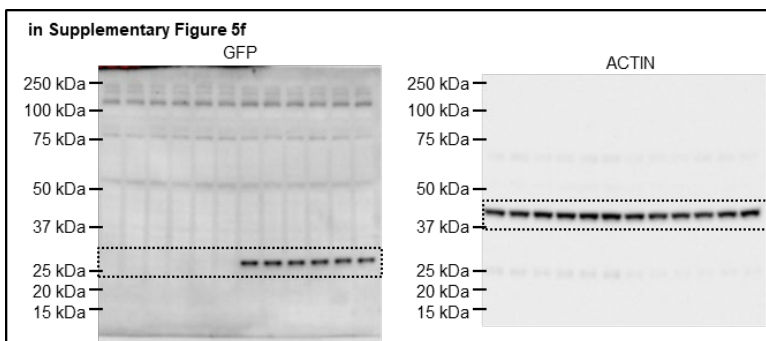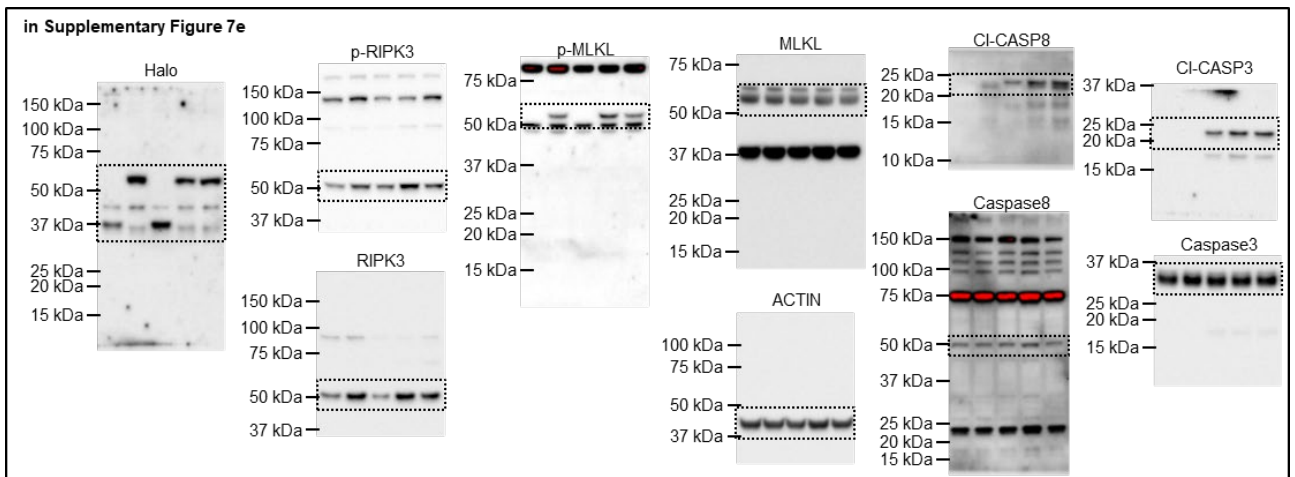



Uncropped images of haematoxylin and eosin, TUNEL and Sirius red staining.

in Supplementary Figure 1a

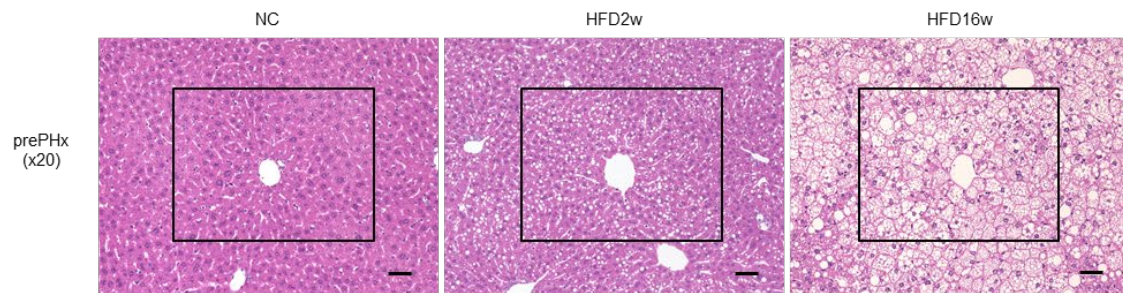

in Supplementary Figure 3e

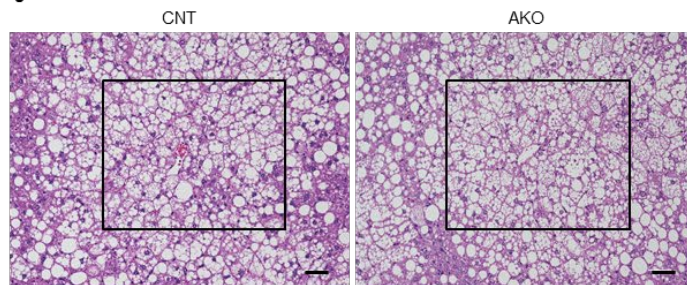

in Supplementary Figure 8a

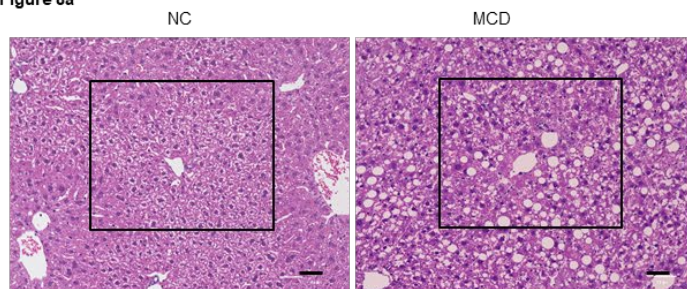

in Supplementary Figure 8d

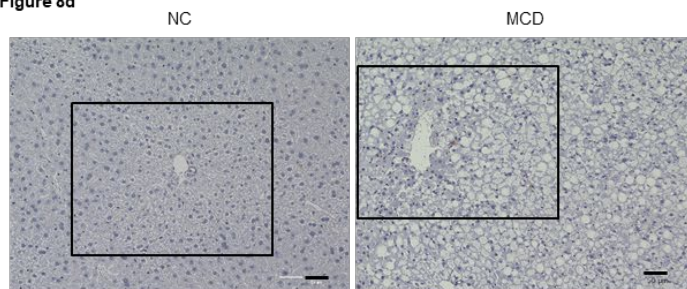

in Supplementary Figure 8f

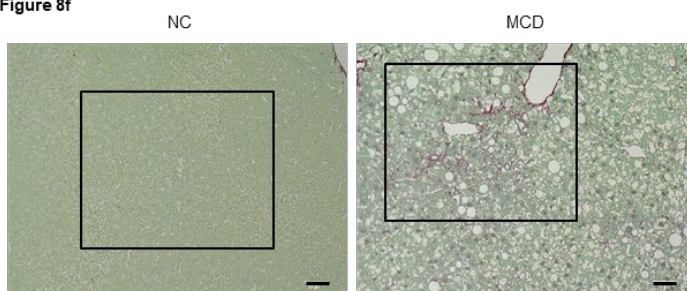

Supplement: 41467_2023_35804_MOESM1_ESM.pdf [file 41467_2023_35804_MOESM1_ESM.pdf]
